# Supplementary material for: Management, Surveillance Patterns, and Costs Associated With Low-Grade Papillary Stage Ta Non–Muscle-Invasive Bladder Cancer Among Older Adults, 2004-2013
Source: PubMed Central journal article supplement (PMC8933744; doi:10.1001/jamanetworkopen.2022.3050), 2022-03-18
Supplement: jamanetwopen-e223050-s001.pdf [file jamanetwopen-e223050-s001.pdf]

## Supplementary Online Content

Bree KK, Shan Y, Hensley PJ, et al. Management, surveillance patterns, and costs associated with low-grade papillary stage Ta non–muscle-invasive bladder cancer among older adults, 2004-2013. *JAMA Netw Open.* 2022;5(3):e223050. doi:10.1001/jamanetworkopen.2022.3050

**eTable 1.** Drug and Procedure Codes

**eTable 2.** Adherence to Current Low-Risk NMIBC Guidelines 1 Year After Diagnosis

**eFigure.** Study Flow Diagram Illustrating Cohort Selection

This supplementary material has been provided by the authors to give readers additional information about their work.

**eTable 1.** Drug and Procedure Codes

|                                                | <b>CPT/HCPCS</b>                                                                                                  | <b>ICD-9-PCS</b>   |
|------------------------------------------------|-------------------------------------------------------------------------------------------------------------------|--------------------|
| <b>Screening</b>                               |                                                                                                                   |                    |
| <b>Cystoscopy</b>                              | 52000                                                                                                             |                    |
| <b>CT/MRI</b>                                  | 74176, 74177, 74178, 74181, 74182, 74183, 74150, 74160, 74170, 72194, 72197                                       |                    |
| <b>Renal Ultrasound</b>                        | 76770, 76775                                                                                                      |                    |
| <b>IV Pyelography</b>                          | 74400-74415                                                                                                       |                    |
| <b>Retrograde pyelogram</b>                    | 74420, 52005                                                                                                      |                    |
| <b>Urine cytology or other urine biomarker</b> | 88112, 88120, 88121, 86316, 86294, 86386, 81479, 88106, 88108                                                     |                    |
| <b>Treatment</b>                               |                                                                                                                   |                    |
| <b>TURBT</b>                                   | 52234, 52235, 52240                                                                                               |                    |
| <b>BCG therapy</b>                             | J9031, 90586                                                                                                      |                    |
| <b>Intravesical chemotherapy</b>               | 51720                                                                                                             |                    |
| <b>Radical cystectomy</b>                      | 51570, 51575, 51580, 51585, 51590, 51595, 51596, 51597                                                            | 57.71, 57.79, 68.8 |
| <b>Radiation</b>                               | 77261, 77385, 77386, 77399, 77401-77499, 77371-77373, G0173, G0174, G0251, G0339, G0340, G6001-G6017, 77520-77525 | 92.21–92.29        |

Abbreviations: BCG, bacillus Calmette-Guérin; CPT, Current Procedural Terminology; CT, computed tomography; HCPCS, Healthcare Common Procedure Coding System; ICD-9(10)-PCS, International Classification of Diseases, Ninth (Tenth) Revision, Procedure Coding System; MRI, magnetic resonance imaging; TURBT, transurethral resection of bladder tumor.

**eTable 2.** Adherence to Current Low-Risk NMIBC Guidelines 1 Year After Diagnosis<sup>a</sup>

| Quality of care measure                                 | 2004-2008    | 2009-2013    |         |
|---------------------------------------------------------|--------------|--------------|---------|
|                                                         | N (%)        | N (%)        | P-value |
| <b>≤2 Cystoscopies</b>                                  | 4,398 (55.2) | 2,736 (53.8) | 0.108   |
| <b>≤1 Cytology</b>                                      | 5,103 (64.1) | 2,748 (54.0) | <.0001  |
| <b>≤1 Upper tract imaging</b>                           | 4,181 (52.5) | 2,585 (50.8) | 0.061   |
| <b>Absence of any BCG instillation</b>                  | 6,492 (81.5) | 4,312 (84.7) | <.0001  |
| <b>Absence of intravesical chemotherapy<sup>b</sup></b> | 6,302 (79.1) | 3,912 (76.9) | 0.0027  |

Abbreviations: BCG, bacillus Calmette-Guérin; NMIBC, non-muscle invasive bladder cancer.

<sup>a</sup>The AUA/SUO guidelines recommend the following surveillance within 1 year of diagnosis<sup>5</sup>:

- Cystoscopies: two (first-look cystoscopy at 3 months, followed by repeat cystoscopy at 6-9 months)
- Upper tract imaging: none
- Urine-based tests: none

<sup>b</sup>Intravesical chemotherapy: receipt of intravesical treatment beyond single perioperative dose

**eFigure.** Study Flow Diagram Illustrating Cohort Selection

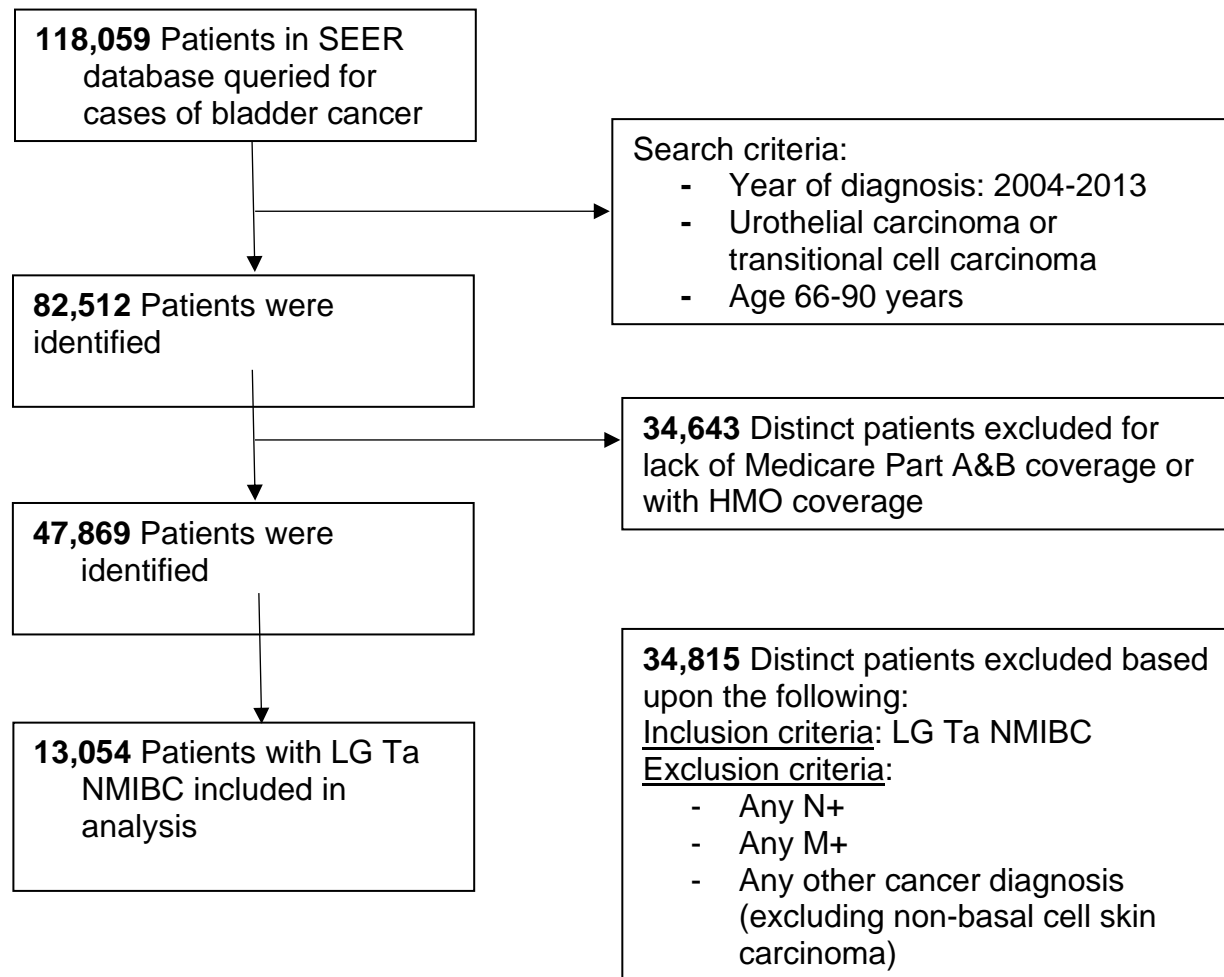

Abbreviations: HMO, health maintenance organization; NMIBC, non-muscle invasive bladder cancer; SEER, surveillance, epidemiology, and end results.
